# Supplementary material for: A structured additive modeling of diabetes and hypertension in Northeast India
Source: PubMed Central journal article supplement (PMC8758063; doi:10.1371/journal.pone.0262560), 2022-01-13
Supplement: pone.0262560.s001.pdf [file pone.0262560.s001.pdf]

**S1 Table: Breakup of 82 districts by States in Northeast India.**

| State                    | Districts           | State               | Districts     |
|--------------------------|---------------------|---------------------|---------------|
| <b>Arunachal Pradesh</b> | Tawang              | <b>Assam</b>        | Kokrajhar     |
|                          | West Kameng         |                     | Dhubri        |
|                          | East Kameng         |                     | Goalpara      |
|                          | Papum Pare          |                     | Barpeta       |
|                          | Upper Subansiri     |                     | Marigaon      |
|                          | West Siang          |                     | Nagaon        |
|                          | East Siang          |                     | Sonitpur      |
|                          | Upper Siang         |                     | Lakhimpur     |
|                          | Changlang           |                     | Dhemaji       |
|                          | Tirap               |                     | Tinsukia      |
|                          | Lower Subansiri     |                     | Dibrugarh     |
|                          | Kurung Kumey        |                     | Sivasagar     |
|                          | Dibang Valley       |                     | Jorhat        |
|                          | Lower Dibang Valley |                     | Golaghat      |
|                          | Lohit               |                     | Karbi Anglong |
| Anjaw                    | Dima Hasao          |                     |               |
| <b>Nagaland</b>          | Mon                 | Cachar              |               |
|                          | Mokokchung          | Karimganj           |               |
|                          | Zunheboto           | Hailakandi          |               |
|                          | Wokha               | Bongaigaon          |               |
|                          | Dimapur             | Chirang             |               |
|                          | Phek                | Kamrup              |               |
|                          | Tuensang            | Kamrup Metropolitan |               |
|                          | Longleng            | Nalbari             |               |
|                          | Kiphire             | Baksa               |               |
|                          | Kohima              | Darrang             |               |
|                          | Peren               | Udalguri            |               |
| <b>Meghalaya</b>         | West Garo Hills     | <b>Manipur</b>      | Senapati      |
|                          | East Garo Hills     |                     | Tamenglong    |
|                          | South Garo Hills    |                     | Churachandpur |
|                          | West Khasi Hills    |                     | Bishnupur     |
|                          | Ri Bhoi             |                     | Thoubal       |
|                          | East Khasi Hills    |                     | Imphal West   |
|                          | Jaintia Hills       |                     | Imphal East   |
| <b>Mizoram</b>           | Mamit               | <b>Tripura</b>      | Ukhrul        |
|                          | Kolasib             |                     | Chandel       |
|                          | Aizawl              |                     | West Tripura  |
|                          | Champhai            |                     | South Tripura |
|                          | Serchhip            |                     | Dhalai        |
|                          | Lunglei             |                     | North Tripura |
|                          | Lawangtlai          |                     |               |
| Saiha                    |                     |                     |               |
